# Supplementary material
Source: PubMed Central journal article supplement (PMC3497808)
Supplement: 1201793109_pnas.1201793109_SI.pdf [file 1201793109_pnas.1201793109_SI.pdf]

# Supporting Information

Wensley et al. 10.1073/pnas.1201793109

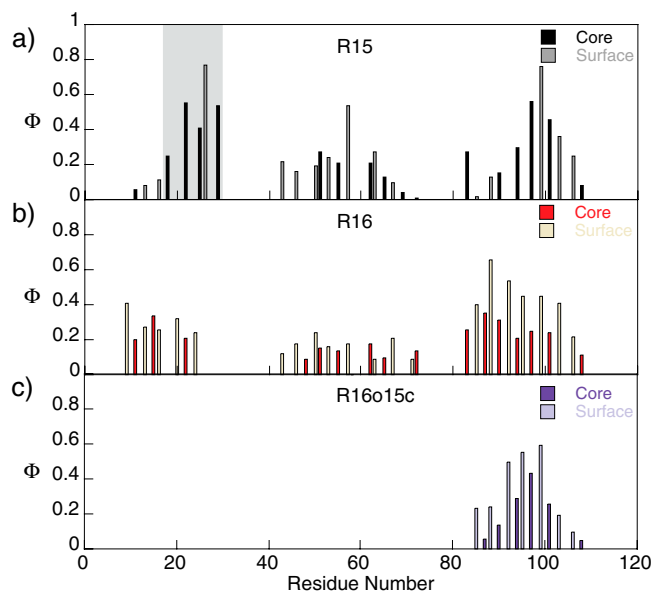

**Fig. S1.** Core swapped versions of R16 fold by a mechanism more like R15. (Data taken from refs. 1–3).

1. Scott KA, Randles LG, Clarke J (2004) The folding of spectrin domains II: phi-value analysis of R16. *J Mol Biol* 344:207–221.
2. Wensley BG, Gärtner M, Choo W, Batey S, Clarke J (2009) Different members of a simple three-helix bundle protein family have very different folding rate constants and fold by different mechanisms. *J Mol Biol* 390:1074–1085.
3. Wensley BG, et al. (2010) Experimental evidence for a frustrated energy landscape in a three-helix-bundle protein family. *Nature* 463:685–688.





**Table S1. Equilibrium and kinetic parameters for R16 and R17 mutants**

| Domain                                                                           | [Den] <sub>50%</sub><br>(M) | $m_{D-N}^{eqb}$<br>(kcal mol <sup>-1</sup> M <sup>-1</sup> ) | $\Delta G_{D-N}^{H_2O}$<br>(kcal mol <sup>-1</sup> ) | $k_f^{H_2O}$ (s <sup>-1</sup> ) | $m_{k_f}$ (M <sup>-1</sup> ) | $k_u^{H_2O}$ (s <sup>-1</sup> )                | $m_{k_u}$ (M <sup>-1</sup> ) | $\Delta G_{kin}^{H_2O}$<br>(kcal mol <sup>-1</sup> ) |
|----------------------------------------------------------------------------------|-----------------------------|--------------------------------------------------------------|------------------------------------------------------|---------------------------------|------------------------------|------------------------------------------------|------------------------------|------------------------------------------------------|
| <b>R16</b>                                                                       |                             |                                                              |                                                      |                                 |                              |                                                |                              |                                                      |
| R16 WT*                                                                          | 3.3 (±0.1)                  | 1.9 (±0.1)                                                   | 6.4 (±0.2)                                           | 126 (±2)                        | 2.0 (±0.1)                   | $3.2 \times 10^{-3}$ (±1 × 10 <sup>-4</sup> )  | 1.2 <sup>†</sup>             | 6.3 (±0.3)                                           |
| Individual substitutions in A helix of R16 to residue found in R15               |                             |                                                              |                                                      |                                 |                              |                                                |                              |                                                      |
| R16 E18F                                                                         | 3.4 (±0.1)                  | 1.9 (±0.1)                                                   | 6.5 (±0.1)                                           | 2,200 (±200)                    | 1.8 (±0.1)                   | $6.4 \times 10^{-2}$ (±9 × 10 <sup>-3</sup> )  | 1.2 <sup>†</sup>             | 6.2 (±0.1)                                           |
| R16 E19D                                                                         | 2.5 (±0.1)                  | 2.0 (±0.1)                                                   | 4.9 (±0.1)                                           | 81 (±4)                         | 2.0 (±0.1)                   | $1.10 \times 10^{-2}$ (±8 × 10 <sup>-4</sup> ) | 1.2 <sup>†</sup>             | 5.3 (±0.1)                                           |
| R16 I22L                                                                         | 2.5 (±0.1)                  | 2.0 (±0.1)                                                   | 4.9 (±0.1)                                           | 139 (±5)                        | 2.0 (±0.1)                   | $3.9 \times 10^{-2}$ (±2 × 10 <sup>-3</sup> )  | 1.2 <sup>†</sup>             | 4.8 (±0.1)                                           |
| R16 K25V                                                                         | 3.3 (±0.1)                  | 1.9 (±0.1)                                                   | 6.4 (±0.1)                                           | 630 (±50)                       | 1.8 (±0.1)                   | $1.7 \times 10^{-2}$ (±3 × 10 <sup>-3</sup> )  | 1.2 <sup>†</sup>             | 6.2 (±0.1)                                           |
| R16 V29L                                                                         | 3.6 (±0.1)                  | 1.9 (±0.1)                                                   | 7.0 (±0.1)                                           | 313 (±9)                        | 1.8 (±0.1)                   | $3.0 \times 10^{-3}$ (±3 × 10 <sup>-4</sup> )  | 1.2 <sup>†</sup>             | 6.9 (±0.1)                                           |
| Other substitutions of E18                                                       |                             |                                                              |                                                      |                                 |                              |                                                |                              |                                                      |
| R16 E18A                                                                         | 3.1 (±0.1)                  | 2.2 (±0.1)                                                   | 6.0 (±0.1)                                           | 900 (±60)                       | 2.0 (±0.1)                   | 0.05 (±0.01)                                   | 1.2 <sup>†</sup>             | 5.8 (±0.1)                                           |
| R16 E18L                                                                         | 4.1 (±0.1)                  | 1.8 (±0.1)                                                   | 7.9 (±0.1)                                           | 3,800 (±200)                    | 1.8 (±0.1)                   | $1.4 \times 10^{-2}$ (±1 × 10 <sup>-3</sup> )  | 1.2 <sup>†</sup>             | 7.4 (±0.1)                                           |
| R16 E18Q                                                                         | 3.3 (±0.1)                  | 2.1 (±0.1)                                                   | 6.2 (±0.1)                                           | 280 (±10)                       | 2.0 (±0.1)                   | $9.2 \times 10^{-3}$ (±9 × 10 <sup>-4</sup> )  | 1.2 <sup>†</sup>             | 6.1 (±0.1)                                           |
| Other substitutions of K25                                                       |                             |                                                              |                                                      |                                 |                              |                                                |                              |                                                      |
| R16 K25M                                                                         | 3.9 (±0.1)                  | 2.2 (±0.1)                                                   | 7.4 (±0.1)                                           | 1,490 (±50)                     | 1.7 (±0.1)                   | $7.1 \times 10^{-3}$ (±1 × 10 <sup>-3</sup> )  | 1.2 <sup>†</sup>             | 7.3 (±0.1)                                           |
| R16 K25A <sup>‡</sup>                                                            | 3.2 (±0.1)                  | 1.8 (±0.1)                                                   | 6.2 (±0.1)                                           | 400 (±10)                       | 1.9 (±0.1)                   | $1.2 \times 10^{-2}$ (±9 × 10 <sup>-4</sup> )  | 1.2 <sup>†</sup>             | 6.2 (±0.1)                                           |
| R16 E18A                                                                         | 3.1 (±0.1)                  | 2.2 (±0.1)                                                   | 6.0 (±0.1)                                           | 900 (±60)                       | 2.0 (±0.1)                   | 0.05 (±0.01)                                   | 1.2 <sup>†</sup>             | 5.8 (±0.1)                                           |
| <b>R17</b>                                                                       |                             |                                                              |                                                      |                                 |                              |                                                |                              |                                                      |
| R17 WT*                                                                          | 3.1 (±0.1)                  | 2.0 (±0.1)                                                   | 6.0 (±0.2)                                           | 30 (±2)                         | 2.3 (±0.1)                   | $4.0 \times 10^{-4}$ (±3 × 10 <sup>-5</sup> )  | 1.5 (±0.1)                   | 6.6 (±0.3)                                           |
| Substitutions at positions E18 and K25 in A helix of R17 to residue found in R15 |                             |                                                              |                                                      |                                 |                              |                                                |                              |                                                      |
| R17 E18F                                                                         | 2.2 (±0.1)                  | 1.9 (±0.1)                                                   | 4.2 (±0.1)                                           | 170 (±20)                       | 1.8 (±0.1)                   | 0.37 (±0.04)                                   | 1.2 (±0.1)                   | 3.6 (±0.1)                                           |
| R17 K25V                                                                         | 3.4 (±0.1)                  | 1.9 (±0.1)                                                   | 6.3 (±0.2)                                           | 84 (±3)                         | 2.2 (±0.1)                   | $1.2 \times 10^{-3}$ (±1 × 10 <sup>-4</sup> )  | 1.2 (±0.1)                   | 6.6 (±0.1)                                           |
| R17 E18F/K25V                                                                    | 2.0 (±0.1)                  | 1.5 (±0.1)                                                   | 3.1 (±0.1)                                           | 210 (±60)                       | 1.5 (±0.2)                   | 3.7 (±0.5)                                     | 0.9 (±0.1)                   | 2.4 (±0.2)                                           |
| R16 K25M                                                                         | 3.9 (±0.1)                  | 2.2 (±0.1)                                                   | 7.4 (±0.1)                                           | 1,490 (±50)                     | 1.7 (±0.1)                   | $7.1 \times 10^{-3}$ (±1 × 10 <sup>-3</sup> )  | 1.2 <sup>†</sup>             | 7.3 (±0.1)                                           |
| R16 K25A <sup>‡</sup>                                                            | 3.2 (±0.1)                  | 1.8 (±0.1)                                                   | 6.2 (±0.1)                                           | 400 (±10)                       | 1.9 (±0.1)                   | $1.2 \times 10^{-2}$ (±9 × 10 <sup>-4</sup> )  | 1.2 <sup>†</sup>             | 6.2 (±0.1)                                           |

\*R15, R16, and R17 data are taken from Scott et al. (1). These data are included for comparison.

<sup>†</sup>This is the globally fitted R16 unfolding  $m$  value determined from the R16  $\Phi$ -value data set (2).

<sup>‡</sup>R16 K25A data taken from in Scott et al. (2).

1. Scott KA, Batey S, Hooton KA, Clarke J (2004) The folding of spectrin domains I: Wild-type domains have the same stability but very different kinetic properties. *J Mol Biol* 344:195–205.
2. Scott KA, Randles LG, Clarke J (2004) The folding of spectrin domains II: phi-value analysis of R16. *J Mol Biol* 344:207–221.
